# Supplementary material
Source: PubMed Central journal article supplement (PMC4789924)

Table 1. Cronbach Alpha test re-test reliability scores for the total study population and for the younger (<14 years) and older ( $\geq 14$  years) groups<sup>a</sup>

| <b>Cronbach Scores</b>      | <b>All Patients</b> | <b><math>\geq 14</math> y</b> | <b>&lt;14 y</b> |
|-----------------------------|---------------------|-------------------------------|-----------------|
| <b>Pre-Post Total Score</b> | 0.965               | 0.981                         | 0.893           |
| <b>Pre-Post Question 1</b>  | 0.935               | 0.976                         | 0.506           |
| <b>Pre-Post Question 2</b>  | 0.925               | 0.954                         | 0.823           |
| <b>Pre-Post Question 3</b>  | 0.926               | 0.944                         | 0.847           |
| <b>Pre-Post Question 4</b>  | 0.897               | 0.901                         | 0.888           |

<sup>a</sup>Scores >0.80 are indicative of good test re-test reliability.

Table 2. Cronbach alpha test-retest reliability scores for each of the 3 groups (knee injuries, lower extremity non-knee injuries, upper extremity injuries)<sup>a</sup>

| <b>Cronbach Scores</b>      | <b>Knee</b> | <b>Lower Extremity</b> | <b>Upper Extremity</b> |
|-----------------------------|-------------|------------------------|------------------------|
| <b>Pre-Post Total Score</b> | 0.964       | 0.974                  | 0.951                  |
| <b>Pre-Post Question 1</b>  | 0.904       | 0.975                  | 0.915                  |
| <b>Pre-Post Question 2</b>  | 0.947       | 0.905                  | 0.932                  |
| <b>Pre-Post Question 3</b>  | 0.923       | 0.938                  | 0.909                  |
| <b>Pre-Post Question 4</b>  | 0.895       | 0.914                  | 0.851                  |

<sup>a</sup>Scores >0.80 are indicative of good test re-test reliability.

Figure 1. Scoring frequencies (out of a maximum of 1.0) for each of the 4 individual questions for all the patients and for each of the 3 groups (knee injuries, lower extremity non-knee injuries, and upper extremity injuries).

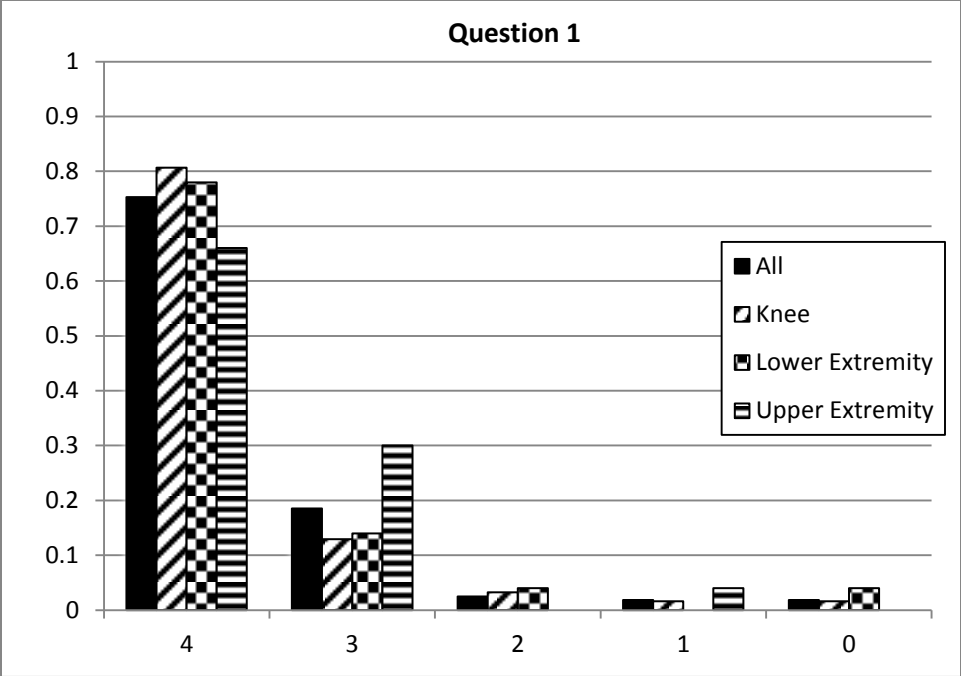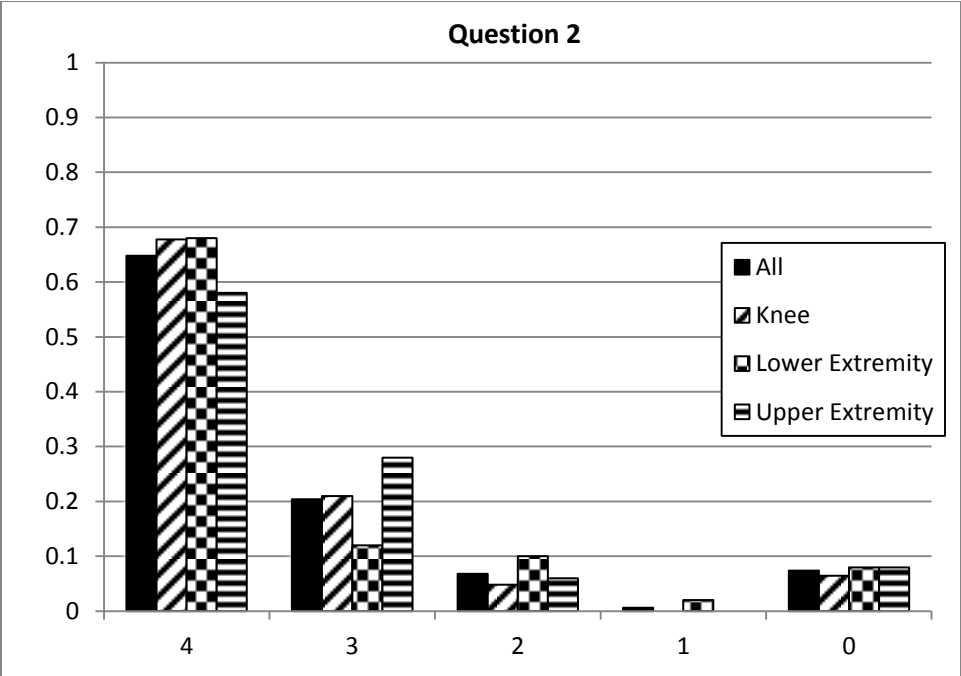

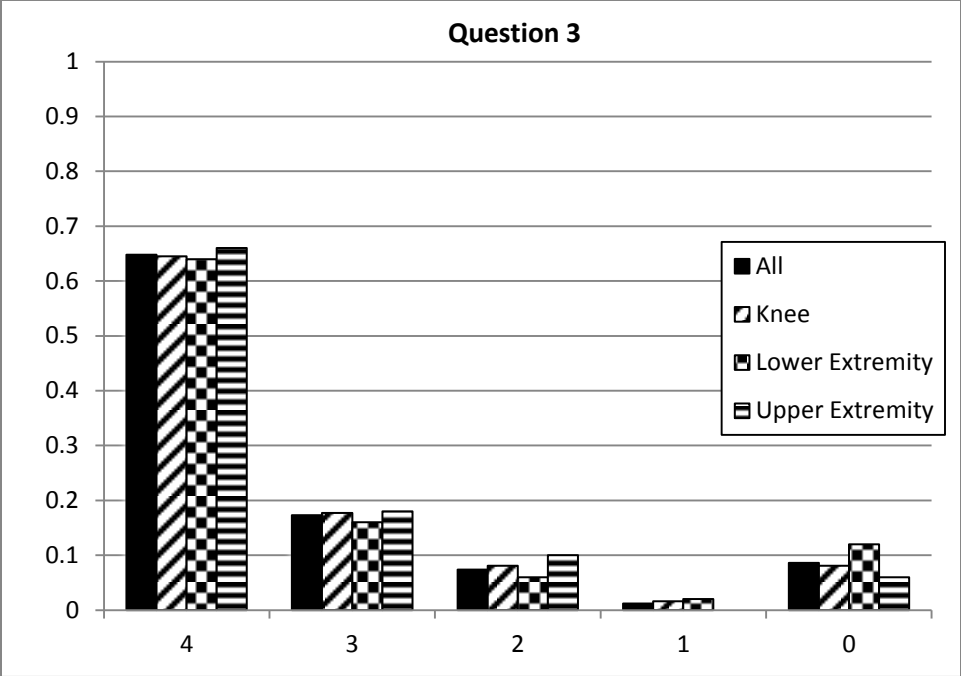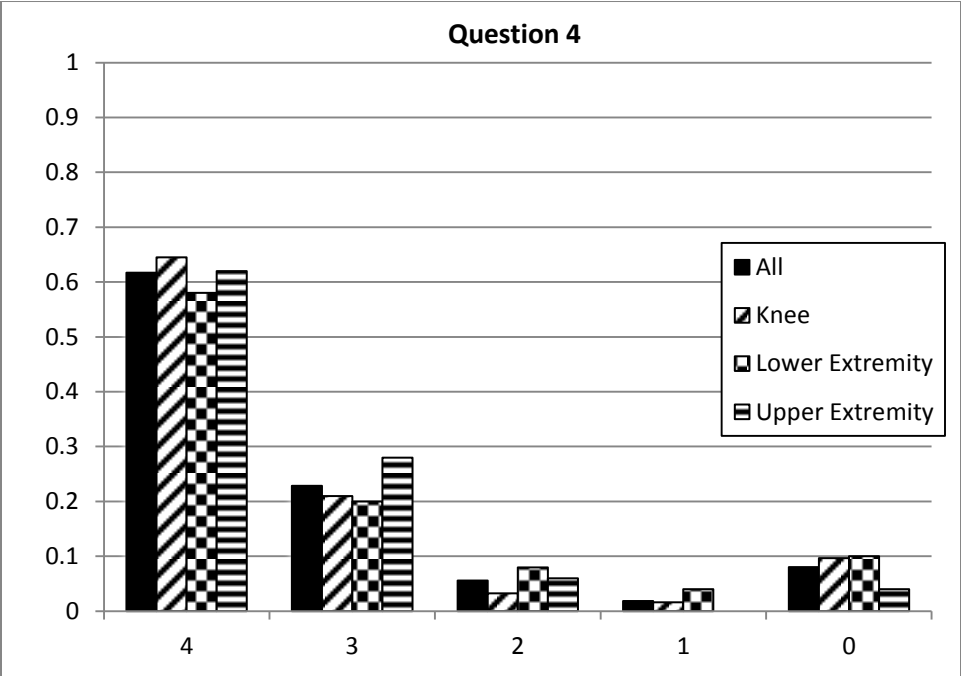

Supplement: DS_10.1177_1941738115600388.pdf [file DS_10.1177_1941738115600388.pdf]
